# Supplementary material
Source: publisher site journal article supplement (https://www.spandidos-publications.com/7431/downloadSupplementary)
Supplement: Supplementary file 1 [file downloadSupplementary]

Table SI. Rat primers for reverse transcription-quantitative PCR.

| Gene name            | Primer sequence (5'-3')     |
|----------------------|-----------------------------|
| IL-6                 | F: TCTGACAGTGCATCATGGC      |
|                      | R: CCAGTTGCCTTCTTGGGAC      |
| IL-23                | F: CAGCAGCTCTCTCGGAATCTC    |
|                      | R: TGGATACGGGGCACATTATTTTT  |
| ROR $\gamma$ t       | F: TCTGGAAGCTGTGGGATAGA     |
|                      | R: GAGGAGCCTGTGGAGAAATAC    |
| TGF- $\beta$         | F: CCGCAACAACGCAATCTA       |
|                      | R: TGAGGAGCAGGAAGGGTC       |
| TNF- $\alpha$        | F: CCACGCTCTTCTGTCTACTG     |
|                      | R: GCTACGGGCTTGTCACTC       |
| IFN- $\gamma$        | F: ACAACCCACAGATCCAGC       |
|                      | R: TCAGCACCGACTCCTTTT       |
| IL-1 $\beta$         | F: GCTAGTGTGTGATGTTCCCATTAG |
|                      | R: CTTTTCCATCTTCTTCTTTGGGTA |
| IL-4                 | F: CACCCTGTTCTGCTTTCT       |
|                      | R: GTGTTGTGAGCGTGGACT       |
| IL-17                | F: TACTCATCCCTCAAAGTTCAGTGT |
|                      | R: CTCTTGCTGGATGAGAACAGAAT  |
| TIMP                 | F: AGCCTGTAGCTGTGCCCAA      |
|                      | R: AACTCCTCGCTGCGGTTCTG     |
| FN                   | F: AGACTGCAGTGACCACCATTC    |
|                      | R: CAATGTGTCCTTGAGAGCATAGAC |
| GAL3                 | F: TCAAGAAAGGGAACGACATC     |
|                      | R: CCTTCCCCAGTTATTGTCCT     |
| I $\kappa$ B $\zeta$ | F: GAAGTCCCGAGGCCAACC       |
|                      | R: AAGTAAGCCAGGTTGAGCGG     |
| GAPDH                | F: ATCACCATCTTCCAGGAGCGA    |
|                      | R: AGCCTTCTCCATGGTGGTGGGA   |

F, forward; R, reverse; IL, interleukin; ROR $\gamma$ t, RAR-related orphan receptor gamma t; TGF- $\beta$ , transforming growth factor beta; TNF- $\alpha$ , tumor necrosis factor alpha; IFN- $\gamma$ , interferon gamma; TIMP, tissue inhibitors of metalloproteinase; FN, fibronectin; GAL3, galectin-3.

Table SII. Catalogue number of antibodies and kits used in the present study.

| Catalogue number | Reagent                                | Supplier                        |
|------------------|----------------------------------------|---------------------------------|
| 130-134-233      | Microbeads CD4(+) T Cell Isolation Kit | Miltenyi Biotec, Inc.           |
| 553058           | Anti-mouse CD3                         | BD Biosciences                  |
| 553295           | Anti-mouse CD28                        | BD Biosciences                  |
| 556970           | Anti-rat CD3                           | BD Biosciences                  |
| 559982           | Anti-rat CD28                          | BD Biosciences                  |
| MA5-11883        | Anti-vimentin                          | Thermo Fisher Scientific, Inc.  |
| ab34710          | Anti-collagen I                        | Abcam                           |
| ab207082         | Anti-ROR $\gamma$ t                    | Abcam                           |
| 9244S            | Anti-I $\kappa$ B $\zeta$              | Cell Signaling Technology, Inc. |
| 14-6731-81       | Anti-pNF- $\kappa$ Bp65                | Thermo Fisher Scientific, Inc.  |
| MA1-140          | Anti- $\beta$ -actin                   | Thermo Fisher Scientific, Inc.  |
| 14-6731-81       | Anti-GAPDH                             | Thermo Fisher Scientific, Inc.  |
| 7076             | Goat anti-mouse IgG antibody           | Cell Signaling Technology, Inc. |
| 7074             | Goat anti-rabbit IgG antibody          | Cell Signaling Technology, Inc. |
| ab6728           | Rabbit-anti-mouse IgG H&L (HRP)        | Abcam                           |
| ab6721           | Goat -anti-rabbit IgG H&L (HRP)        | Abcam                           |
| 88-7170-88       | Rat IL-17A ELISA KIT                   | Thermo Fisher Scientific, Inc.  |
| RIF00            | Rat IFN- $\gamma$ ELISA KIT            | R&D Systems, Inc.               |
| R4000            | Rat IL-4 ELISA KIT                     | R&D Systems, Inc.               |
| ab141140         | Mk886                                  | Abcam                           |
| ab120832         | Fenofibrat                             | Abcam                           |
| ab141142         | Wy14643                                | Abcam                           |
| ab141124         | GW7646                                 | Abcam                           |
